# Supplementary material for: Evolution of peripheral nerve changes in early multiple sclerosis—a longitudinal MR neurography study
Source: PubMed Central journal article supplement (PMC11100769; doi:10.3389/fneur.2024.1335408), 2024-05-03

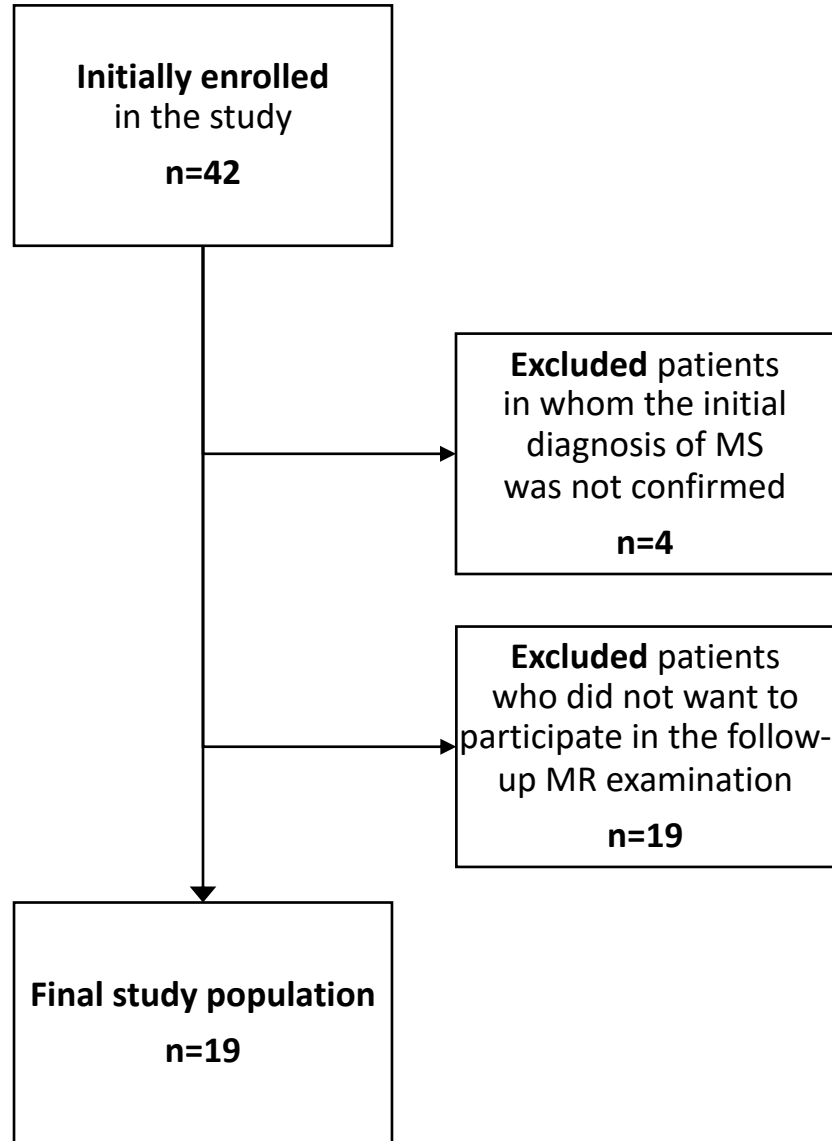

Supplement: Presentation_1.pdf [file Presentation_1.pdf]
